# Supplementary material for: Genome-Wide Identification of Hsp70 Genes in the Large Yellow Croaker (Larimichthys crocea) and Their Regulated Expression Under Cold and Heat Stress
Source: MDPI journal article supplement (doi:10.3390/genes9120590), 2018-11-29
Supplement: s1 [file s1]

Table S1 The species accession numbers of Hsp70 cited in the present study

| Associated Gene Name | NCBI Protein ID                | Species Name | Latin name          |
|----------------------|--------------------------------|--------------|---------------------|
| Human_HSPA1A         | NP_005336.3                    | human        | <i>Homo sapiens</i> |
| Human_HSPA1B         | NP_005337.2                    | human        | <i>Homo sapiens</i> |
| Human_HSPA1L         | NP_005518.3                    | human        | <i>Homo sapiens</i> |
| Human_HSPA2          | NP_068814.2                    | human        | <i>Homo sapiens</i> |
| Human_HSPA4          | NP_002145.3                    | human        | <i>Homo sapiens</i> |
| Human_HSPA4L         | NP_055093.2                    | human        | <i>Homo sapiens</i> |
| Human_HSPA5          | NP_005338.1                    | human        | <i>Homo sapiens</i> |
| Human_HSPA6          | NP_002146.2                    | human        | <i>Homo sapiens</i> |
| Human_HSPA7          | UniProtKB/Swiss-Prot: P48741.2 | human        | <i>Homo sapiens</i> |
| Human_HSPA8          | NP_006588.1                    | human        | <i>Homo sapiens</i> |
| Human_HSPA9          | NP_004125.3                    | human        | <i>Homo sapiens</i> |
| Human_HSPA12A        | NP_079291.2                    | human        | <i>Homo sapiens</i> |
| Human_HSPA12B        | NP_443202.3                    | human        | <i>Homo sapiens</i> |
| Human_HSPA13         | NP_008879.3                    | human        | <i>Homo sapiens</i> |
| Human_HSPA14         | NP_057383.2                    | human        | <i>Homo sapiens</i> |
| Human_HSPH1          | NP_006635.2                    | human        | <i>Homo sapiens</i> |
| Human_HYOU1          | NP_001124463.1                 | human        | <i>Homo sapiens</i> |

| Associated Gene Name | NCBI Protein ID | Species Name | Latin name          |
|----------------------|-----------------|--------------|---------------------|
| Mouse_HSPA1A         | NP_034609.2     | Mouse        | <i>Mus musculus</i> |
| Mouse_HSPA1B         | NP_034608.2     | Mouse        | <i>Mus musculus</i> |
| Mouse_HSPA1L         | NP_038586.2     | Mouse        | <i>Mus musculus</i> |
| Mouse_HSPA2          | NP_001002012.1  | Mouse        | <i>Mus musculus</i> |
| Mouse_HSPA4          | NP_032326.3     | Mouse        | <i>Mus musculus</i> |
| Mouse_HSPA4L         | NP_035150.3     | Mouse        | <i>Mus musculus</i> |
| Mouse_HSPA5          | NP_001156906.1  | Mouse        | <i>Mus musculus</i> |
| Mouse_Hspa8          | NP_112442.2     | Mouse        | <i>Mus musculus</i> |
| Mouse_HSPA9          | NP_034611.2     | Mouse        | <i>Mus musculus</i> |
| Mouse_HSPA12A        | NP_780408.1     | Mouse        | <i>Mus musculus</i> |
| Mouse_HSPA12B        | NP_082582.1     | Mouse        | <i>Mus musculus</i> |
| Mouse_HSPA13         | NP_084477.1     | Mouse        | <i>Mus musculus</i> |
| Mouse_HSPA14         | NP_056580.2     | Mouse        | <i>Mus musculus</i> |
| Mouse_HSPH1          | NP_038587.2     | Mouse        | <i>Mus musculus</i> |
| Mouse_HYOU1          | NP_067370.3     | Mouse        | <i>Mus musculus</i> |

| Associated Gene Name | NCBI/ Ensemble Protein ID | Species Name | Latin name |
|----------------------|---------------------------|--------------|------------|
|----------------------|---------------------------|--------------|------------|

|                  |                    |          |                                 |
|------------------|--------------------|----------|---------------------------------|
| Loc100091897     | XP_001510204.2     | Platypus | <i>Ornithorhynchus anatinus</i> |
| Loc100080044     | XP_001510947.2     | platypus | <i>Ornithorhynchus anatinus</i> |
| Platypus_HSPA2   | ENSOANP00000015027 | platypus | <i>Ornithorhynchus anatinus</i> |
| Platypus_HSPA4   | ENSOANP00000011834 | platypus | <i>Ornithorhynchus anatinus</i> |
| Platypus_HSPA4L  | ENSOANP00000032051 | platypus | <i>Ornithorhynchus anatinus</i> |
| Platypus_HSPA5   | ENSOANP00000020985 | platypus | <i>Ornithorhynchus anatinus</i> |
| Platypus_HSPA6   | ENSOANP00000008582 | platypus | <i>Ornithorhynchus anatinus</i> |
| Platypus_HSPA12A | ENSOANP00000022296 | platypus | <i>Ornithorhynchus anatinus</i> |
| Platypus_HSPA13  | ENSOANP00000004718 | platypus | <i>Ornithorhynchus anatinus</i> |
| Platypus_HSPA14  | ENSOANP00000025044 | platypus | <i>Ornithorhynchus anatinus</i> |
| Loc100078184     | XP_001509055.2     | platypus | <i>Ornithorhynchus anatinus</i> |

| Associated Gene Name | NCBI Protein ID | Species Name | Latin name           |
|----------------------|-----------------|--------------|----------------------|
| Chicken_HSPA2        | NP_001006686.1  | chicken      | <i>Gallus gallus</i> |
| Chicken_HSPA4        | XP_003642142.1  | chicken      | <i>Gallus gallus</i> |
| Chicken_HSPA4L       | NP_001012594.1  | chicken      | <i>Gallus gallus</i> |
| Chicken_HSPA5        | NP_990822.1     | chicken      | <i>Gallus gallus</i> |
| Chicken_HSPA8        | NP_990334.1     | chicken      | <i>Gallus gallus</i> |
| Chicken_HSPA9        | NP_001006147.1  | chicken      | <i>Gallus gallus</i> |
| Chicken_HSPA12A      | XP_421779.3     | chicken      | <i>Gallus gallus</i> |
| Chicken_Loc770082    | XP_001233402.2  | chicken      | <i>Gallus gallus</i> |
| Chicken_HSPA13       | NP_001025964.2  | chicken      | <i>Gallus gallus</i> |
| Chicken_HSPA14       | XP_416996.3     | chicken      | <i>Gallus gallus</i> |
| Chicken_HSPH1        | NP_001153170.1  | chicken      | <i>Gallus gallus</i> |
| Chicken_HYOU1        | NP_001006588.1  | chicken      | <i>Gallus gallus</i> |

| Associated Gene Name | Ensemble Protein ID | Species Name | Latin name                 |
|----------------------|---------------------|--------------|----------------------------|
| Lizard_HSPA2         | ENSACAP00000015494  | Lizard       | <i>Anolis carolinensis</i> |
| Lizard_HSPA4         | ENSACAP00000013089  | lizard       | <i>Anolis carolinensis</i> |
| Lizard_HSPA4         | ENSACAP00000023153  | lizard       | <i>Anolis carolinensis</i> |
| Lizard_HSPA4L        | ENSACAP00000011642  | lizard       | <i>Anolis carolinensis</i> |
| Lizard_HSPA5         | ENSACAP00000004078  | lizard       | <i>Anolis carolinensis</i> |
| Lizard_HSPA8         | ENSACAP00000004798  | lizard       | <i>Anolis carolinensis</i> |
| Lizard_HSPA9         | ENSACAP00000015698  | lizard       | <i>Anolis carolinensis</i> |
| Lizard_HSPA12A       | ENSACAP00000009931  | lizard       | <i>Anolis carolinensis</i> |
| Lizard_HSPA12B       | ENSACAP00000004138  | lizard       | <i>Anolis carolinensis</i> |
| Lizard_HSPA13        | ENSACAP00000000965  | lizard       | <i>Anolis carolinensis</i> |
| Lizard_HSPA14        | ENSACAP00000001088  | lizard       | <i>Anolis carolinensis</i> |
| Lizard_HYOU1         | ENSACAP00000013983  | lizard       | <i>Anolis carolinensis</i> |
| Lizard_HSPH1         | ENSACAP00000004913  | lizard       | <i>Anolis carolinensis</i> |

| Associated Gene Name | NCBI/ Ensemble     |                          | Latin name                 |
|----------------------|--------------------|--------------------------|----------------------------|
|                      | Protein ID         | Species Name             |                            |
| HSPA4                | enspsip00000014785 | Chinese softshell turtle | <i>pelodiscus sinensis</i> |
| HSPA4L               | enspsip00000010121 | Chinese softshell turtle | <i>pelodiscus sinensis</i> |
| HSPA5                | enspsip00000005890 | Chinese softshell turtle | <i>pelodiscus sinensis</i> |
| HSPA9                | enspsip00000014345 | Chinese softshell turtle | <i>pelodiscus sinensis</i> |
| HSPA12B              | enspsip00000004856 | Chinese softshell turtle | <i>pelodiscus sinensis</i> |
| HSPA13               | enspsip00000018220 | Chinese softshell turtle | <i>pelodiscus sinensis</i> |
| HSPA14               | enspsip00000018312 | Chinese softshell turtle | <i>pelodiscus sinensis</i> |
| HYOU1                | xp_006123893.1     | Chinese softshell turtle | <i>pelodiscus sinensis</i> |
| HSPH1                | enspsip00000009634 | Chinese softshell turtle | <i>pelodiscus sinensis</i> |

| Associated Gene Name | NCBI Protein ID                 | Species Name        | Latin name            |
|----------------------|---------------------------------|---------------------|-----------------------|
| HSPA1A               | NP_001167480.1                  | African clawed frog | <i>Xenopus laevis</i> |
| HSPA1B               | NP_001091238.1                  | African clawed frog | <i>Xenopus laevis</i> |
| HSPA1L               | NP_001080068.1                  | African clawed frog | <i>Xenopus laevis</i> |
| HSP70                | NP_001121147.1                  | African clawed frog | <i>Xenopus laevis</i> |
| HSPA2                | NP_001086039.1                  | African clawed frog | <i>Xenopus laevis</i> |
| HSPA4                | NP_001083317.1                  | African clawed frog | <i>Xenopus laevis</i> |
| HSPA5                | NP_001081462.1                  | African clawed frog | <i>Xenopus laevis</i> |
| HSPA5B               | NP_001165648.1                  | African clawed frog | <i>Xenopus laevis</i> |
| HSPA8                | NP_001079632.1                  | African clawed frog | <i>Xenopus laevis</i> |
| HSC70.II             | NP_001165656.1                  | AFRICAN CLAWED FROG | <i>XENOPUS LAEVIS</i> |
| HSPA9A               | NP_001079627.1                  | African clawed frog | <i>Xenopus laevis</i> |
| HSPA9B               | NP_001080166.1                  | African clawed frog | <i>Xenopus laevis</i> |
| HSPA13               | NP_001017223.1                  | African clawed frog | <i>Xenopus laevis</i> |
| Hspa14               | NP_001092168.1                  | African clawed frog | <i>Xenopus laevis</i> |
| HSPA14B              | NP_001091353.1                  | African clawed frog | <i>Xenopus laevis</i> |
| HSPH1A               | NP_001085637.1                  | African clawed frog | <i>Xenopus laevis</i> |
| HYOU1                | UniProtKB/Swiss-Prot : Q566I3.2 | African clawed frog | <i>Xenopus laevis</i> |

| Associated Gene Name | NCBI/ Ensemble Protein ID | Species Name | Latin name         |
|----------------------|---------------------------|--------------|--------------------|
| Zebrafish_Hspa70.3   | NP_571472.1               | zebrafish    | <i>Danio rerio</i> |
| Zebrafish_Hspa70.2   | XP_003198158.1            | zebrafish    | <i>Danio rerio</i> |
| Zebrafish_Hspa70.1   | <b>NP_001349288.1</b>     | zebrafish    | <i>Danio rerio</i> |
| Zebrafish_Hspa1b     | NP_001093532.1            | zebrafish    | <i>Danio rerio</i> |
| Zebrafish_Hspa70l    | NP_001107061.1            | zebrafish    | <i>Danio rerio</i> |
| Zebrafish_Hspa4a     | NP_999881.1               | zebrafish    | <i>Danio rerio</i> |
| Zebrafish_Hspa4b     | NP_956151.1               | zebrafish    | <i>Danio rerio</i> |

|                                      |                |           |                    |
|--------------------------------------|----------------|-----------|--------------------|
| Zebrafish_Hspa4l                     | XP_690505.2    | zebrafish | <i>Danio rerio</i> |
| Zebrafish_Hspa5                      | NP_998223.1    | zebrafish | <i>Danio rerio</i> |
| Zebrafish_Hspa8a                     | NP_001103873.1 | zebrafish | <i>Danio rerio</i> |
| Zebrafish_Hspa8b[hsc70.2(LOC562935)] | NP_001186941.1 | zebrafish | <i>Danio rerio</i> |
| Zebrafish_Hsc70                      | NP_956908.1    | zebrafish | <i>Danio rerio</i> |
| Zebrafish_Hspa9                      | NP_958483.2    | zebrafish | <i>Danio rerio</i> |
| Zebrafish_Hspa12a.1                  | NP_001038342.1 | zebrafish | <i>Danio rerio</i> |
| Zebrafish_Hspa12a.2                  | XP_003198604.1 | zebrafish | <i>Danio rerio</i> |
| Zebrafish_Hsp1a2a.3                  | NP_001038346.2 | zebrafish | <i>Danio rerio</i> |
| Zebrafish_Hspa13                     | NP_001082948.1 | zebrafish | <i>Danio rerio</i> |
| Zebrafish_Hspa14                     | NP_001038541.1 | zebrafish | <i>Danio rerio</i> |
| Zebrafish_Hsph1                      | XP_001919957.1 | zebrafish | <i>Danio rerio</i> |
| Zebrafish_Hyou1                      | NP_997868.1    | zebrafish | <i>Danio rerio</i> |

| Associated Gene Name   | NCBI/Ensemble Protein ID       | Species Name | Latin name             |
|------------------------|--------------------------------|--------------|------------------------|
| Medaka_Hsp70.3(hspa)   | XP_004071143.1                 | Medaka       | <i>Oryzias latipes</i> |
| Medaka_Hsp70-5(hspa1b) | NP_001098384.1                 | medaka       | <i>Oryzias latipes</i> |
| Medaka_Hsc70           | NP_001098385.1                 | medaka       | <i>Oryzias latipes</i> |
| Medaka_Hsc70.2(hspa8b) | XP_004075396.1                 | medaka       | <i>Oryzias latipes</i> |
| Medaka_Hspa8a          | UniProtKB/Swiss-Prot: Q9W6Y1.1 | medaka       | <i>Oryzias latipes</i> |
| Medaka_Hspa4a-201      | ENSORLP00000001795             | medaka       | <i>Oryzias latipes</i> |
| Medaka_Hspa4b-201      | ENSORLP00000007499             | medaka       | <i>Oryzias latipes</i> |
| Medaka_Hspa4l          | XP_004082341.1                 | medaka       | <i>Oryzias latipes</i> |
| Medaka_Hspa5l          | XP_004074796.1                 | medaka       | <i>Oryzias latipes</i> |
| Medaka_Hspa9-201       | ENSORLP00000013340             | medaka       | <i>Oryzias latipes</i> |
| Medaka_Hspa12a-201     | ENSORLP00000001447             | medaka       | <i>Oryzias latipes</i> |
| Medaka_Hspa12b-201     | ENSORLP00000007349             | medaka       | <i>Oryzias latipes</i> |
| Medaka_Hspa13l         | XP_004075919.1                 | medaka       | <i>Oryzias latipes</i> |
| Medaka_Hspa14-201      | ENSORLP00000015785             | medaka       | <i>Oryzias latipes</i> |
| Medaka_Hyou1l          | XP_004084567.1                 | medaka       | <i>Oryzias latipes</i> |

| Associated Gene Name           | NCBI Protein ID | Species Name | Latin name                   |
|--------------------------------|-----------------|--------------|------------------------------|
| Nile                           |                 |              |                              |
| tilapia_Hspa1lpartial(hsp70.3) | xp_003442504.1  | nile tilapia | <i>oreochromis niloticus</i> |
| loc100704606 (hspa1b)          | xp_003444871.1  | nile tilapia | <i>oreochromis niloticus</i> |

|                      |                |              |                              |
|----------------------|----------------|--------------|------------------------------|
| Nile tilapia_Hspa8a  | xp_003448938.1 | Nile tilapia | <i>oreochromis niloticus</i> |
| Hsc70                | xp_003454400.1 | nile tilapia | <i>oreochromis niloticus</i> |
| Nile tilapia_Hspa8b  | xp_003455104.1 | nile tilapia | <i>oreochromis niloticus</i> |
| Nile tilapia_Hspa4l  | xp_003453147.1 | nile tilapia | <i>oreochromis niloticus</i> |
| Nile tilapia_Hspa5a  | xp_005470418.1 | nile tilapia | <i>oreochromis niloticus</i> |
| Nile tilapia_Hspa5b  | xp_003459659.1 | nile tilapia | <i>oreochromis niloticus</i> |
| Nile tilapia_Hspa9   | xp_003459471.1 | nile tilapia | <i>oreochromis niloticus</i> |
| loc100699432         | xp_003457416.1 | nile tilapia | <i>oreochromis niloticus</i> |
| Nile tilapia_Hspa12b | xp_003452414.1 | nile tilapia | <i>oreochromis niloticus</i> |
| loc100708509         | xp_003441638.1 | nile tilapia | <i>oreochromis niloticus</i> |
| loc100697637         | xp_003455685.1 | nile tilapia | <i>oreochromis niloticus</i> |
| loc100691644         | xp_003448981.1 | nile tilapia | <i>oreochromis niloticus</i> |

| Associated Gene Name  | NCBI/ Ensemble Protein ID | Species Name | Latin name               |
|-----------------------|---------------------------|--------------|--------------------------|
| Torafugu_Hsp70.3      | XP_003964983.1            | torafugu     | <i>Takifugu rubripes</i> |
| Torafugu_Hspa1b       | XP_003963154.1            | torafugu     | <i>Takifugu rubripes</i> |
| Torafugu_Hspa2-201    | ENSTRUT00000005983        | torafugu     | <i>Takifugu rubripes</i> |
| Torafugu_Hspa8        | XP_003977939.1            | torafugu     | <i>Takifugu rubripes</i> |
| Torafugu_Hsc70        | XP_003966054.1            | torafugu     | <i>Takifugu rubripes</i> |
| Torafugu_loc101063130 | XP_003965205.1            | torafugu     | <i>Takifugu rubripes</i> |
| Torafugu_loc101077300 | XP_003977088.1            | torafugu     | <i>Takifugu rubripes</i> |
| Torafugu_loc101063656 | XP_003968291.1            | torafugu     | <i>Takifugu rubripes</i> |
| Torafugu_Hspa4a       | ENSTRUT00000021036        | torafugu     | <i>Takifugu rubripes</i> |
| Torafugu_Hspa4b       | ENSTRUT00000016139        | torafugu     | <i>Takifugu rubripes</i> |
| Torafugu_Hspa12a      | ENSTRUT00000009556        | torafugu     | <i>Takifugu rubripes</i> |
| Torafugu_Hspa12b      | ENSTRUT00000006941        | torafugu     | <i>Takifugu rubripes</i> |
| Torafugu_Hspa14       | ENSTRUT00000031936        | torafugu     | <i>Takifugu rubripes</i> |
| Torafugu_loc101065326 | XP_003977948.1            | torafugu     | <i>Takifugu rubripes</i> |

| Associated Gene Name | Ensemble Protein ID | Species Name | Latin name                    |
|----------------------|---------------------|--------------|-------------------------------|
| Stickleback_Hspa4a   | ENSGACP00000027410  | Stickleback  | <i>Gasterosteus aculeatus</i> |
| Stickleback_Hspa4b   | ENSGACP00000024055  | stickleback  | <i>Gasterosteus aculeatus</i> |
| Stickleback_Hspa4l   | ENSGACP00000010866  | stickleback  | <i>Gasterosteus aculeatus</i> |
| Stickleback_Hspa5    | ENSGACP00000021969  | stickleback  | <i>Gasterosteus aculeatus</i> |
| Stickleback_HSPA8a   | ENSGACP00000013930  | stickleback  | <i>Gasterosteus aculeatus</i> |
| Stickleback_Hspa8b   | ENSGACP00000026579  | stickleback  | <i>Gasterosteus aculeatus</i> |
| Stickleback_Hspa9    | ENSGACP00000025843  | stickleback  | <i>Gasterosteus aculeatus</i> |
| Stickleback_Hspa12a  | ENSGACP00000019311  | stickleback  | <i>Gasterosteus aculeatus</i> |
| Stickleback_Hspa12b  | ENSGACP00000026246  | stickleback  | <i>Gasterosteus aculeatus</i> |
| Stickleback_Hspa13   | ENSGACP00000008388  | stickleback  | <i>Gasterosteus aculeatus</i> |
| Stickleback_Hspa14   | ENSGACP00000025513  | stickleback  | <i>Gasterosteus aculeatus</i> |

Stickleback\_Hyou1

ENSGACP00000026575

stickleback

*Gasterosteus aculeatus*

---
